# Supplementary material for: Poly(polyoxometalate)s assembled by {Ni6PW9} units: from ring-shaped Ni24-tetramers to rod-shaped Ni40-octamers
Source: Royal Society of Chemistry journal article supplement (doi:10.1039/c2cc34332k), 2012-01-01
Supplement: c2cc34332k.pdf [file c2cc34332k.pdf]

## Supporting Information

### Poly(polyoxometalate)s: Assembled by $\{\text{Ni}_6\text{PW}_9\}$ Units: From Ring-shaped $\text{Ni}_{24}$ -Tetramer to Rod-shaped $\text{Ni}_{40}$ -Octamer

Ling Huang,<sup>a</sup> Jie Zhang,<sup>a</sup> Lin Cheng,<sup>a</sup> and Guo-Yu Yang<sup>\*a,b</sup>

<sup>a</sup>State Key Laboratory of Structural Chemistry, Fujian Institute of Research on the Structure of Matter, Chinese Academy of Sciences, Fuzhou, Fujian 350002, China. E-mail: ygy@fjirsm.ac.cn

<sup>b</sup>School of Chemistry, Beijing Institute of Technology, Beijing 100081, China. E-mail: ygy@bit.edu.cn

- Figure S1.** a) View of the stacking mode and the space filling of **1** along the c- and a-axis, respectively.
- Figure S2.** The ball-and-stick representations of Ni<sub>2</sub>- and Ni<sub>6</sub>-based octahedra with the square plane Ni-O bond lengths and the axial Ni-O bond lengths in tetramer **1**, respectively.
- Figure S3.** a) and b) View of linkage of octamer **2** and the Cu<sub>16</sub>-based tetramer. c) The  $\{\text{Ni}_6\}$  unit with penta-coordinated Ni<sub>22</sub> atom and its coordination environment in **2b**. d) The  $\{\text{Cu}_6\}$  unit and its coordination environment.
- Figure S4.** The ball-and-stick representations of Ni<sub>5</sub>-/Ni<sub>6</sub>-/Ni<sub>1</sub>-/Ni<sub>12</sub>-/Ni<sub>10</sub>-/Ni<sub>18</sub>-/Ni<sub>15</sub>-based octahedra with the square plane Ni-O bond lengths and the axial Ni-O bond lengths in octamer **2**, respectively.
- Figure S5.** a) The ball-and-stick view of  $\{\text{WNi}_{12}\}$  trimer in cluster  $[\text{Ni}_{12}(\text{OH})_9\text{WO}_4(\text{W}_7\text{O}_{26}(\text{OH}))(\text{PW}_9\text{O}_{34})_3]^{25-}$  and the  $\{\text{Ni}_{12}\}$  trimer after the removing of the central W atom. b) The ball-and-stick view of  $\{\text{WNi}_{12}\}$  dimer in octamer **2** and the two isolated Ni<sub>6</sub> clusters formed after the removing of the central W atom.
- Figure S6.** a) and b) The stacking mode and space filling of octamer **2** along the a-axis, respectively. c) The stacking mode of octamer **2** along the a-axis, showing the location of the Ni-based complexes and lattice water molecules.
- Figure S7.** View of the extra large channels in **2** along the rotated a-axis.
- Figure S8.** The stacking mode of the octamer **2** in the structure along the a-axis.
- Figure S9.** Temperature dependence of  $\chi_m T$  (◆) and  $\chi_m$  (○) values for **1** between 2.0 to 300 K.
- Figure S10.** Temperature dependence of  $\chi_m T$  (◆) and  $\chi_m$  (○) values for **2** between 2.0 to 300 K.
- Figure S11.** Temperature dependence of  $\chi_m^{-1}$  for **1** and **2**. The solid lines are the best-fit according to the Curie-Weiss law.
- Figure S12.** Thermodiffractograms of poly(POT)s samples **1** and **2**.
- Figure S13.** IR spectra of poly(POT)s **1** and **2**.
- Figure S14.** TG curves of poly(POT)s **1** and **2**, respectively.

## Experimental Section

All chemicals employed in this study were analytical reagent. Elemental analyses of C, H and N were carried out with a Vario EL III elemental analyzer. IR spectra (KBr pellets) were recorded on an ABB Bomen MB 102 spectrometer. Thermal analyses were performed in a dynamic oxygen atmosphere with a heating rate of 10 °C/min using a METTLER TGA/SDTA 851° thermal analyzer. X-ray diffraction data were collected on a Mercury-CCD diffractometer with graphite-monochromated MoK $\alpha$  ( $\lambda = 0.71073 \text{ \AA}$ ) at room temperature. The program SADABS was used for the absorption correction. The structures were solved by the direct method and refined on F<sup>2</sup> by full-matrix least-squares methods using the SHELX97 program package. Powder XRD patterns were obtained using a Philips X'Pert-MPD diffractometer with CuK $\alpha$  radiation ( $\lambda = 1.54056 \text{ \AA}$ ). Variable temperature susceptibility measurements were carried out in the temperature range 2-300 K at a magnetic field of 1 kOe for **1** and **2** on polycrystalline samples with a Quantum Design MPMS XL-5 SQUID magnetometer. All the magnetic susceptibility data were corrected for magnetization of the sample holder and for diamagnetic contribution estimated from Pascal's constants.

### Synthesis:

Synthesis of **1** and **2**: Na<sub>9</sub>[A- $\alpha$ -PW<sub>9</sub>O<sub>34</sub>] $\cdot$ nH<sub>2</sub>O were prepared by a literature method.<sup>[1]</sup> A sample of PW<sub>9</sub> (0.24 g) and Ni(OAc)<sub>2</sub> $\cdot$ 4H<sub>2</sub>O (0.20 g) were stirred in distilled water (8 mL), and then enMe (0.20 mL for **1**) or en (0.10 mL for **2**) and acetic acid (0.12 mL for **1**, and 0.10 mL for **2**) were dropwise added with continuous stirring for 20 min (pH<sub>s</sub> = 6.2 for **1** and 5.7 for **2**). The resulting solution was sealed in a 35-mL stainless steel reactor with a Teflon liner and heated at 170 °C for 3 days and then cooled to room temperature (pH<sub>e</sub> = 6.0 for **1** and 5.6 for **2**). Green prismatic crystals of **1** and **2** were obtained (note the B type isomers were obtained from the A type starting material). Yields: 27% for **1** and 30% for **2** based on Ni(OAc)<sub>2</sub> $\cdot$ 4H<sub>2</sub>O, respectively. Details of elemental analysis, IR, XRD, TGA, and magnetic measurements of **1** and **2** are given under below.

1 A. P. Ginsberg, *Inorganic Syntheses*, Vol. 27, Wiley, New York, 1990, p.85.

### Crystal data:

Crystal data: **1**:  $M_r = 12262.69$ , monoclinic,  $P2_1/n$ ,  $a = 20.518(3)$ ,  $b = 23.518(3)$ ,  $c = 27.721(5) \text{ \AA}$ ,  $\beta = 111.402(2)^\circ$ ,  $V = 12454(3) \text{ \AA}^3$ ,  $Z = 2$ ,  $\rho_{\text{calcd}} = 3.270 \text{ g cm}^{-3}$ ,  $\mu = 18.509 \text{ mm}^{-1}$ ,  $F(000) = 11108$ , GOF = 1.126. A total of 107016 reflections were collected, 28481 of which were unique ( $R_{\text{int}} = 0.0822$ ).  $R_1/wR_2 = 0.0863/0.1896$  for 1397 parameters and 26117 reflections ( $I > 2\sigma(I)$ ). **2**:  $M_r = 23793.07$ , triclinic,  $P-1$ ,  $a = 13.724(3)$ ,  $b = 28.811(8)$ ,  $c = 30.191(8) \text{ \AA}$ ,  $\alpha = 108.865(4)^\circ$ ,  $\beta = 90.168(2)(5)^\circ$ ,  $\gamma = 97.909(2)^\circ$ ,  $V = 11174(5) \text{ \AA}^3$ ,  $Z = 1$ ,  $\rho_{\text{calcd}} = 3.536 \text{ g cm}^{-3}$ ,  $\mu = 20.967 \text{ mm}^{-1}$ ,  $F(000) = 10664$ , GOF = 1.031. A total of 132870 reflections were collected, 50914 of which were unique ( $R_{\text{int}} = 0.1043$ ).  $R_1/wR_2 = 0.0904/0.1922$  for 2455 parameters and 29013 reflections ( $I > 2\sigma(I)$ ). CCDC-821914-821915 contains the supplementary crystallographic data for this paper. These data can be obtained free of charge from The Cambridge Crystallographic Data Centre via [www.ccdc.cam.ac.uk/data\\_request/cif](http://www.ccdc.cam.ac.uk/data_request/cif).

### Elemental analysis and IR data:

Elemental analysis calcd (%) for [Ni(enMe)<sub>2</sub>][H<sub>2</sub>Ni<sub>24</sub>P<sub>4</sub>W<sub>36</sub>(OH)<sub>12</sub>O<sub>136</sub>(enMe)<sub>12</sub>(OAc)<sub>4</sub>(H<sub>2</sub>O)<sub>12</sub>] $\cdot$ 10H<sub>2</sub>O ([Ni(enMe)<sub>2</sub>] $\cdot$ 10H<sub>2</sub>O) and [Ni(en)<sub>2</sub>]<sub>2</sub>[Ni(en)<sub>2</sub>(H<sub>2</sub>O)<sub>2</sub>]<sub>2</sub>[Ni(en)(H<sub>2</sub>O)<sub>2</sub>]<sub>2</sub>[H<sub>4</sub>Ni<sub>40</sub>P<sub>8</sub>W<sub>72</sub>(OH)<sub>18</sub>O<sub>272</sub>(en)<sub>18</sub>(OAc)<sub>2</sub>(WO<sub>4</sub>)<sub>2</sub>(H<sub>2</sub>O)<sub>18</sub>] $\cdot$ 10H<sub>2</sub>O ([Ni(en)<sub>2</sub>]<sub>2</sub>[Ni(en)<sub>2</sub>(H<sub>2</sub>O)<sub>2</sub>]<sub>2</sub>[Ni(en)(H<sub>2</sub>O)<sub>2</sub>]<sub>2</sub> $\cdot$ 10H<sub>2</sub>O) (OAc = CH<sub>3</sub>COO<sup>-</sup>; enMe = 1,2-diaminopropane; en = ethylenediamine) are as follows:

- (1) C<sub>50</sub>H<sub>210</sub>N<sub>28</sub>Ni<sub>25</sub>O<sub>178</sub>P<sub>4</sub>W<sub>36</sub> (**1**,  $M_r = 12262.69$ ): C 4.90, H 1.73, N 3.20, found: C 5.52, H 1.90, N 3.46. IR (KBr, cm<sup>-1</sup>): 3433s, 3169s, 1617m, 1556m, 1400s, 1199m, 1041s, 942s, 848m, 786m, 708m, 584m, 410w.
- (2) C<sub>60</sub>H<sub>324</sub>N<sub>56</sub>Ni<sub>46</sub>O<sub>338</sub>P<sub>8</sub>W<sub>74</sub> (**2**,  $M_r = 23793.07$ ): C 3.03, H 1.37, N 3.30, found: C 3.47, H 1.66, N 3.64. IR (KBr, cm<sup>-1</sup>): 3433s, 3144s, 1614s, 1454w, 1400s, 1236w, 1281w, 1038s, 941m, 899w, 842, 778w, 770m, 591w, 504w.

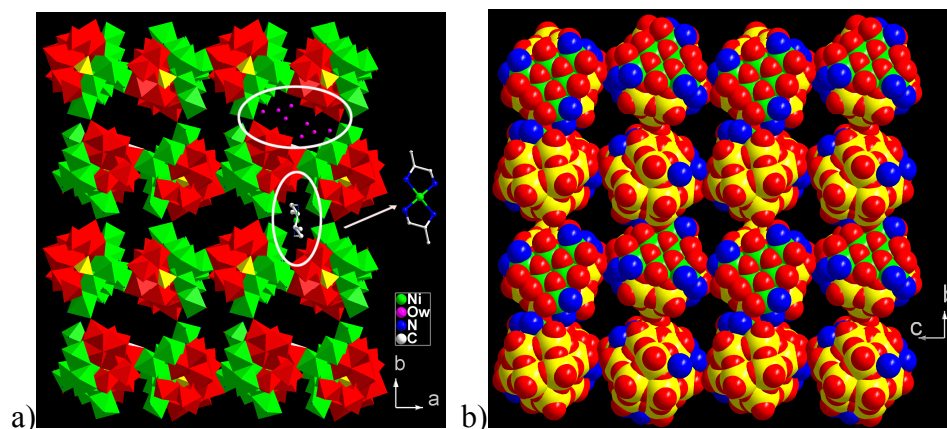

**Figure S1.** a) View of the stacking mode of **1** along the *c*-axis, showing the  $-ABAB\dots$  arrangement and the location of the  $[\text{Ni}(\text{enMe})_2]^{2+}$  complexes and the lattice water molecules. b) View of the space filling of **1** along the *a*-axis, showing the  $-ABAB\dots$  arrangement, in which the  $[\text{Ni}(\text{enMe})_2]^{2+}$  complexes and the lattice water molecules are omitted for clarity.

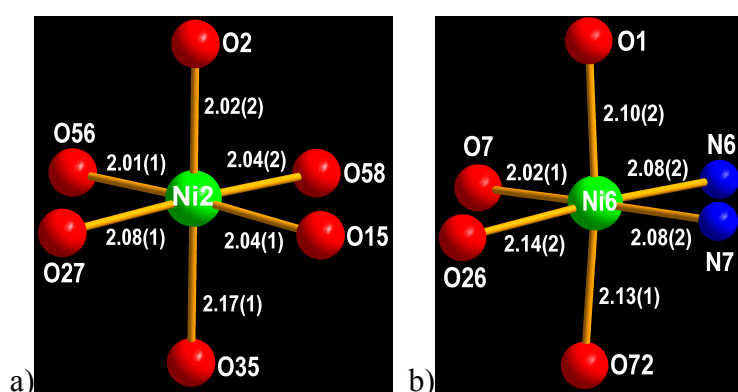

**Figure S2.** The ball-and-stick representations of Ni2- and Ni6-based octahedra with the square plane Ni-O bond lengths and the axial Ni-O bond lengths in **1**, respectively.

As shown in Figure S2, the square plane Ni-O 2.01(1)~2.08(1) Å and the axial Ni-O 2.02(2)~2.17(1) Å in  $\text{Ni}_2\text{O}_4\text{O}_2\text{O}_{35}$  octahedron (Figure S2a), while in  $\text{Ni}_6\text{O}_4\text{O}_1\text{O}_{72}$  octahedron (Figure S2b), the square plane Ni-O 2.02(1)~2.14(2) and the axial Ni-O 2.10(2)~2.13(1) Å respectively, in which the lengths of the axial Ni-O bonds ( $\text{Ni}_2\text{-O}_{35}$ ,  $\text{Ni}_6\text{-O}_{72}$  and  $\text{Ni}_6\text{-O}_1$ ) are longer than that of the square plane Ni-O bonds, showing the John-Teller distortion with the axial elongation exists in these Ni-octahedra. Such the axial elongation of the octahedra reduces or overcomes large steric hindrance to some extent when the big **1b** unit attacks **1a** unit, and favors to the occurrence of the substitution reaction between **1a** and **1b** units, resulting in a novel circular poly(POT) tetramer.

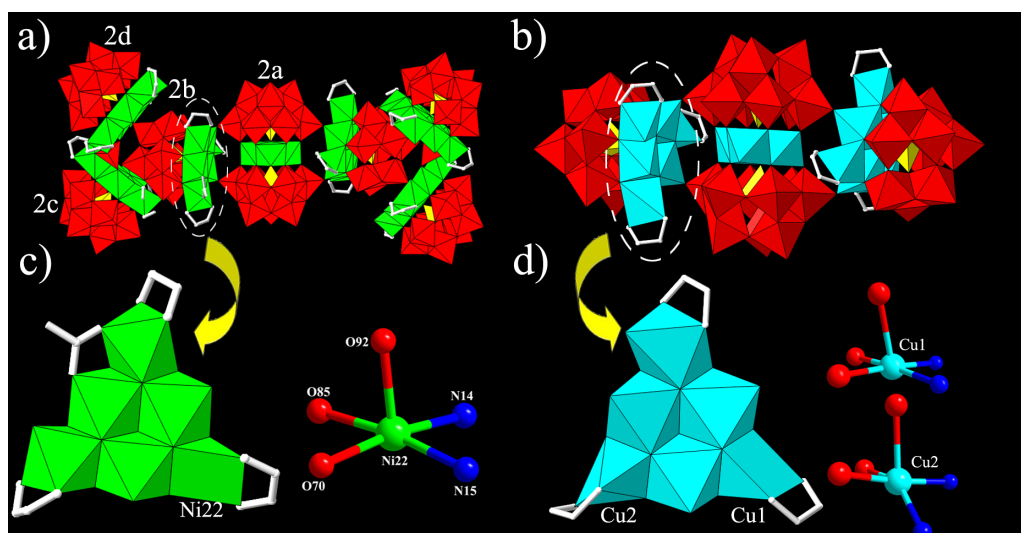

**Figure S3.** a) View of linkage of octamer **2**, in which the tetramer  $\{[\text{Ni}_6\text{PW}_9][\text{Ni}_4(\text{PW}_9)_2][\text{Ni}_6\text{PW}_9]\}$ , i.e.  $\{[\mathbf{2b}][\mathbf{2a}][\mathbf{2b}]\}$ , is included. b) View of linkage of  $\text{Cu}_{16}$ -based tetramer  $\{[\text{Cu}_6\text{PW}_9][\text{Cu}_4(\text{PW}_9)_2][\text{Cu}_6\text{PW}_9]\}$ . c) The  $\{\text{Ni}_6\}$  unit containing a penta-coordinated  $\text{Ni}_{22}$  center with square pyramid geometry in **2b** and the coordination environment of penta-coordinated  $\text{Ni}_{22}$  in **2b**. d) The  $\{\text{Cu}_6\}$  unit in  $\text{Cu}_{16}$ -based tetramer and the coordination environment of penta-coordinated  $\text{Cu}_1$  and  $\text{Cu}_2$  centers with square pyramid and trigonal bipyramid, respectively.

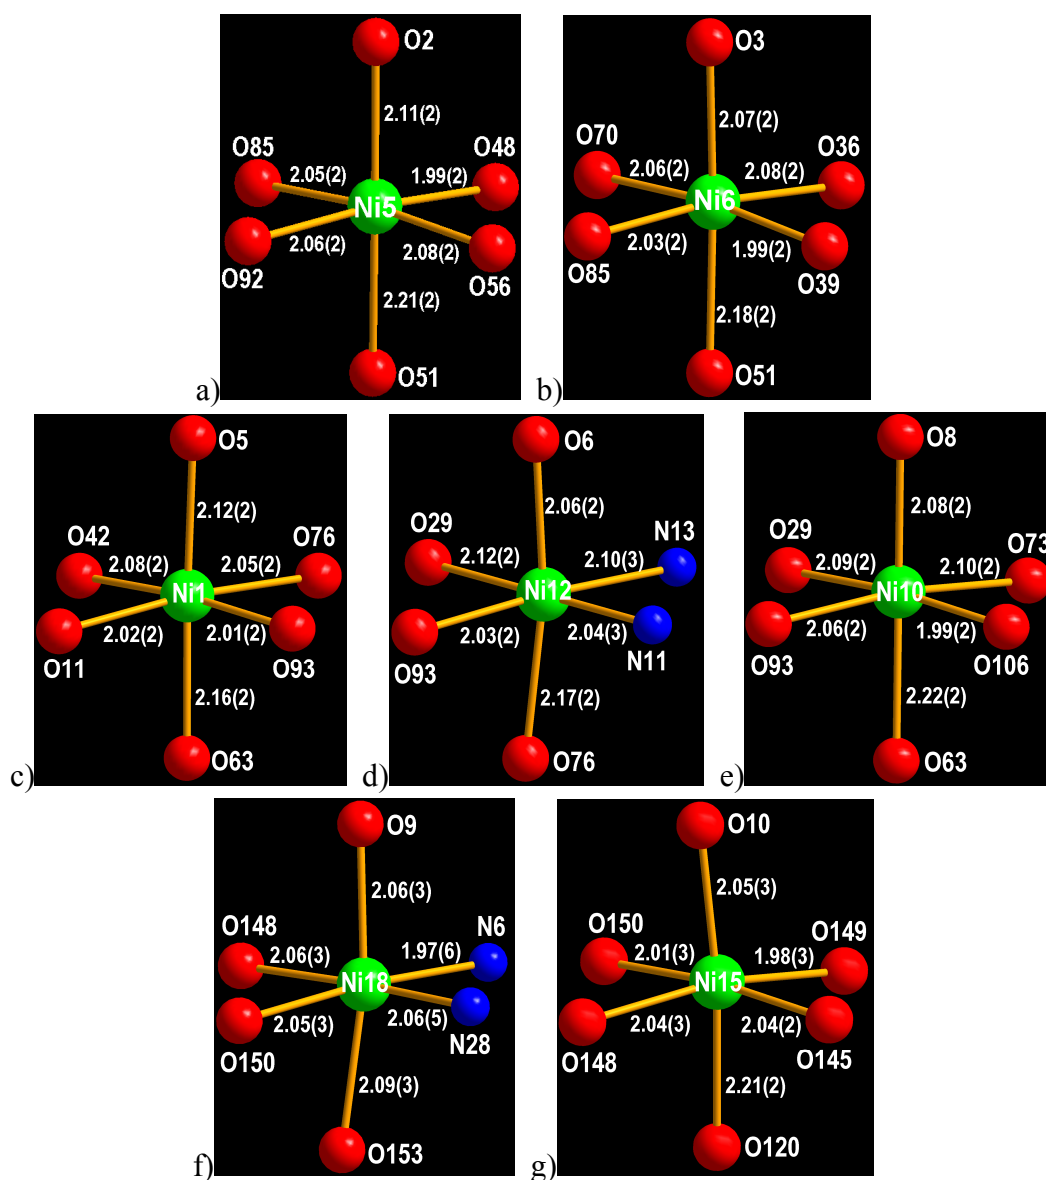

**Figure S4.** a~g) The ball-and-stick representations of Ni5-/Ni6-/Ni1-/Ni12-/Ni10-/Ni18-/Ni15-based octahedra with the square plane Ni-O bond lengths and the axial Ni-O bond lengths in **2**, respectively.

As shown in Figure S4a/b, the square plane Ni-O 1.99(2)~2.08(2) Å and the axial Ni-O 2.11(2)~2.21(2) Å in Ni5O<sub>4</sub>O2O51 octahedron (Figure S4a), while in Ni6O<sub>4</sub>O3O51 octahedron (Figure S4b), the square plane Ni-O 1.99(2)~2.08(2) and the axial Ni-O 2.07(2)~2.18(2)Å respectively, in which the lengths of the axial Ni-O bonds (Ni5-O2, Ni5-O51, Ni6-O3 and Ni6-O51) are longer than that of the square plane Ni-O bonds, showing the Jahn-Teller distortion with the axial elongation exists in these Ni-octahedra. Such the axial elongation of the octahedra in combination of the penta-coordinated Ni22-based square pyramid Ni22O<sub>3</sub>N<sub>2</sub> (Figure S3c) with less steric hindrance will reduce or overcome large steric hindrance when the big **2a** unit attacks two **2b** units. These two factors favor to the occurrence of the substitution reaction between **2a** and two **2b** units to some extent and the formation of the poly(POT) tetramer {[2b][2a][2b]}, which can be viewed as the synergistic effect between the square pyramids with the less steric hindrance and the Jahn-Teller effect of the octahedra with the axial elongation.

The detailed bond lengths in Ni(1,10,12,15,18)-based octahedra containing O(5,6,8,9,10) atoms are list as follows: 1) In Ni10O<sub>4</sub>O5O63 octahedron (Figure S4c), the square plane Ni-O 2.01(2)~2.08(2) Å, and the axial Ni-O 2.12(2)~2.16(2)Å; 2) in Ni12O<sub>2</sub>N<sub>2</sub>O6O76 octahedron (Figure S4d), the square plane Ni-N/O 2.03(2)~2.12(2) Å, and the axial Ni-O 2.06(2)~2.17(2) Å; 3) in Ni10O<sub>4</sub>O8O63 octahedron (Figure S4e), the square plane Ni-O 1.99(2)~2.10(2) Å, and the axial Ni-O 2.08(2)~2.22(2) Å; 4) in Ni18O<sub>2</sub>N<sub>2</sub>O9O153 (Figure S4f), the square plane Ni-N/O 1.97(2)~2.06(2) Å, and the axial Ni-O 2.06(2)~2.09(3) Å; 5) in Ni15O<sub>4</sub>O10O120 (Figure S4g), the square plane Ni-O 1.98(3)~2.04(2) Å, and the axial Ni-O 2.05(3)~2.21(2) Å. By comparing the bond length regions of the above five Ni-based octahedra containing O(5,6,8,9,10) atoms and found that all the axial Ni-O lengths are longer than the square plane Ni-O lengths, indicating Jahn-Teller effect with the axial elongation exists in the above five Ni-octahedra, which reduces or overcomes large steric hindrance when the substitution reactions take place, and favor to the formation of the hexamer {[2c][2b][2a][2b][2c]} and the octamer **2**. Here, the driving force of the assembly of the hexamer {[2c][2b][2a][2b][2c]} and the octamer **2** is mainly attributed to the Jahn-Teller effect of the octahedra with the axial elongation.

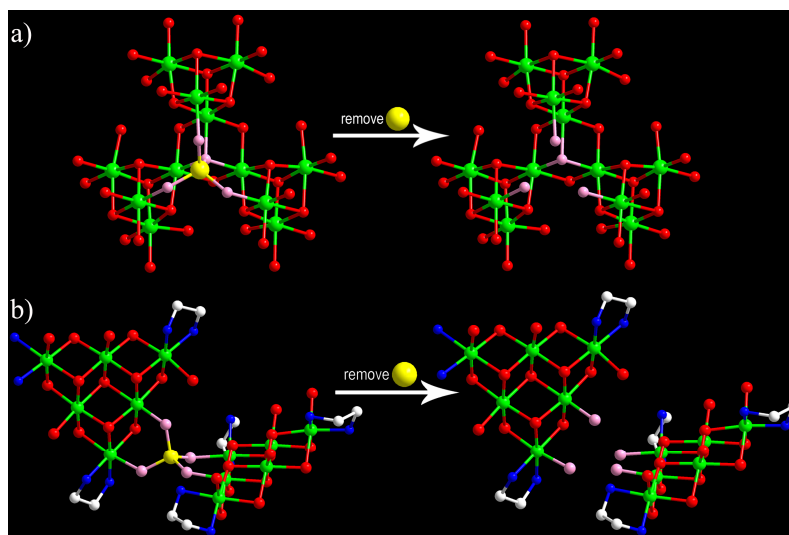

**Figure S5.** a) The ball-and-stick view of {WNI<sub>12</sub>} trimer in cluster [Ni<sub>12</sub>(OH)<sub>9</sub>WO<sub>4</sub>(W<sub>7</sub>O<sub>26</sub>(OH))(PW<sub>9</sub>O<sub>34</sub>)<sub>3</sub>]<sup>25-</sup> (**3**) and the {NI<sub>12</sub>} trimer after the removing of the central W atom. b) The ball-and-stick view of {WNI<sub>12</sub>} dimer in octamer **2** and the two isolated Ni<sub>6</sub> clusters formed after the removing of the central W atom. Color code: W, yellow; the O atoms linked to the W atom and Ni atoms, pink; the O atoms only bonded to the Ni atoms, red; the Ni atoms, green.

As shown in Figure S5, the role of the WO<sub>4</sub> group in **2** and **3** are different. Four O atoms of WO<sub>4</sub> group of {WNI<sub>12</sub>} trimer in **3** link the Ni<sub>12</sub> unit via three μ-O from three Ni<sub>4</sub> cores and a μ<sub>4</sub>-O atom shared by one W and three Ni<sub>4</sub> cores (Figure S5a, left). If the W atom is removed from the {WNI<sub>12</sub>} trimer in **3**, three μ-O and one μ<sub>4</sub>-O atoms will become three terminal O and one μ<sub>3</sub>-O linked three Ni<sub>4</sub> cores (Figure S5a, right), respectively, i.e. three Ni<sub>4</sub> cores in the {NI<sub>12</sub>} trimer (Figure S5a, right) still connect each other by a μ<sub>3</sub>-O atom, even if the absence of the W atom. Two of three Ni<sub>4</sub> cores in {NI<sub>12</sub>} trimer link each other not only by a μ-O atom but also by a μ<sub>3</sub>-O atom (Figure S5a, right). Therefore, the W atom is not necessary in the formation of the {NI<sub>12</sub>} trimer in **3**. In octamer **2**, four O atoms of the WO<sub>4</sub> unit in the dimer {WNI<sub>12</sub>} (Figure S5b, left) connect two Ni<sub>6</sub> clusters via four μ-O atoms. If the W atom is removed from the dimer {WNI<sub>12</sub>} in **2**, not only four μ-O atoms will become terminal water ligands but also the linkages between two Ni<sub>6</sub> clusters will be cut (Figure S5b, right). Therefore, the W atoms as inorganic bridges are necessary and plays a crucial role in the formation of the dimer {WNI<sub>12</sub>} and **2**, and such linking mode is first observed in TM-substituted poly(POM) chemistry.

So, the difference between **2** and **3** can be concluded as: 1) Four O atoms of the WO<sub>4</sub> group in **3** link to the Ni<sub>12</sub> unit via three μ-O of three Ni<sub>4</sub> cores and a μ<sub>4</sub>-O atom shared by one W and three Ni<sub>4</sub> cores. If the W atom is removed from **3**, three μ-O and one μ<sub>4</sub>-O atoms will become three terminal O and one μ<sub>3</sub>-O linked three Ni<sub>4</sub> cores, respectively, i.e. three Ni<sub>4</sub> cores still connect each other by a μ<sub>3</sub>-O atom, even if the absence of the W atom. Two of three Ni<sub>4</sub> cores in **3** link each other not only by a μ-O atom but also by a μ<sub>3</sub>-O atom. Therefore, the W atom is not necessary in the formation of **3**. 2) In **2**, four O atoms of the WO<sub>4</sub> unit connect two adjacent Ni<sub>6</sub> clusters via four μ-O atoms. If the W atom is removed from **2**, not only four μ-O atoms will become terminal water ligands but also the linkages between two adjacent Ni<sub>6</sub> clusters will be cut.

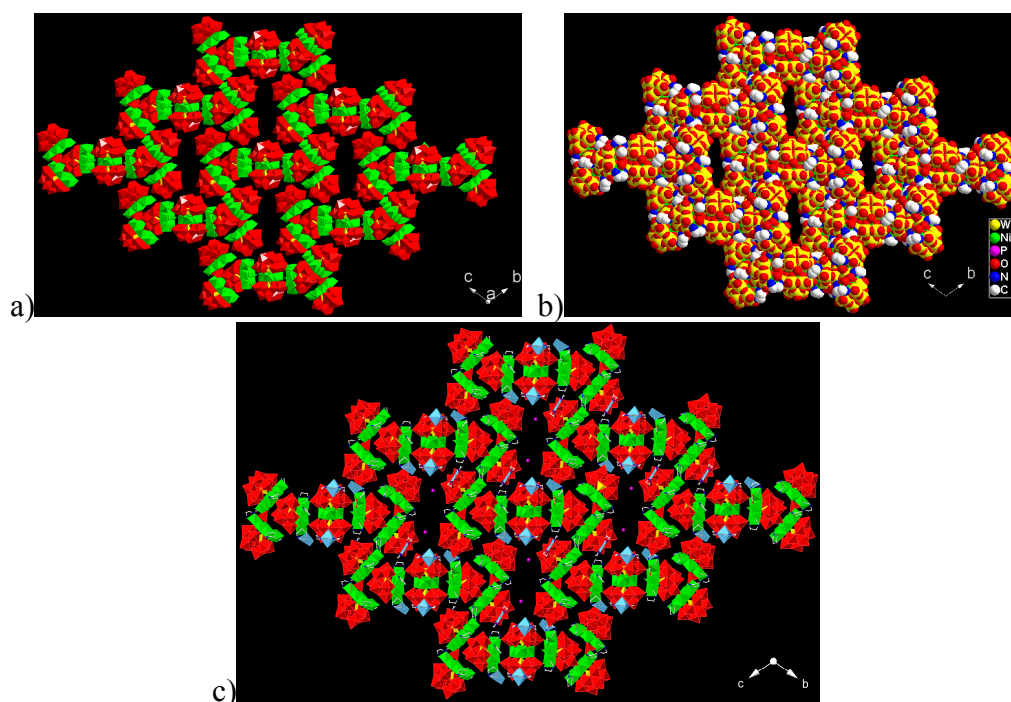

**Figure S6.** a) and b) The stacking mode and space filling of octamer 2 along the *a*-axis, respectively. The Ni-based complexes and lattice water molecules are omitted for clarity. c) The stacking mode of octamer 2 along the *a*-axis, showing the location of the Ni-based complexes and lattice water molecules. Notice that only the lattice water molecules located in the large channels of 2. Violet ball: H<sub>2</sub>O; cyan Ni-based polyhedra.

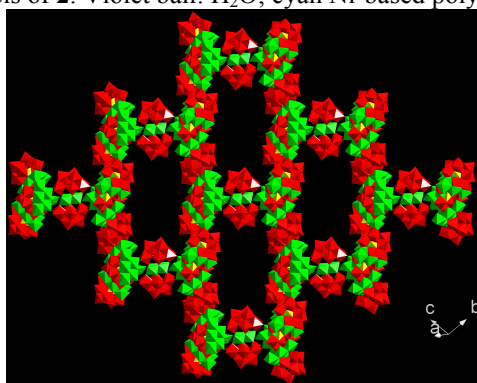

**Figure S7.** View of the extra large channels in 2 along the rotated *a*-axis.

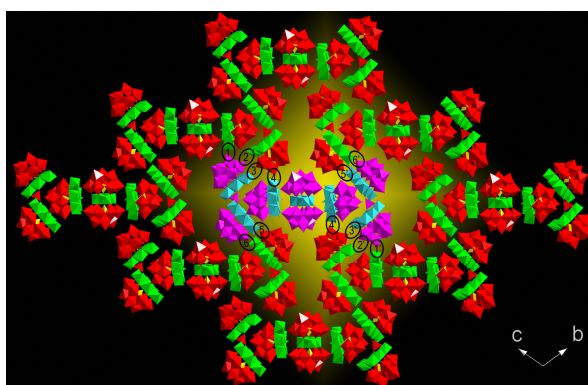

**Figure S8.** The stacking mode of the octamer 2 in the structure along the *a*-axis, in which the central octamer 2 is marked with different colors for distinguishing it from the surrounding octamers 2. Color code: Violet for PW<sub>9</sub> units and WO<sub>4</sub> groups, and cyan for Ni<sub>6</sub> units in the central octamer; while red for PW<sub>9</sub> units and WO<sub>4</sub> groups, and green for Ni<sub>6</sub> units in the surrounding octamers 2.

To compound 2, in which some water ligands of the Ni<sub>6</sub> units are very good centers for further structural derivation through intermolecular substitution reactions i.e. by replacing the related water ligand of the Ni<sub>6</sub> units with the adjacent terminal O atoms of the PW<sub>9</sub> units via the Ni-O=W linkages when the steric hindrance is allowable under the rational conditions, which provide the potential for making extended poly(POT)s or real open frameworks with large or extra-large channels built up from the big SBUs of octamer 2.

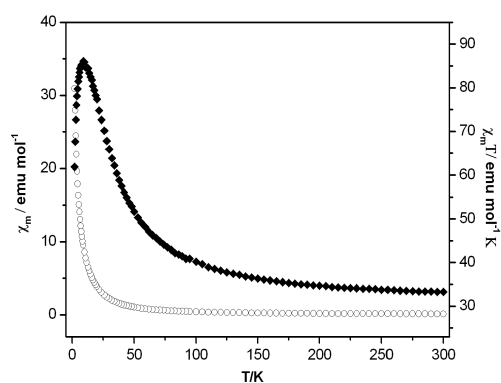

Figure S9. Temperature dependence of  $\chi_m T$  (◆) and  $\chi_m$  (○) values for **1** between 2.0 to 300 K.

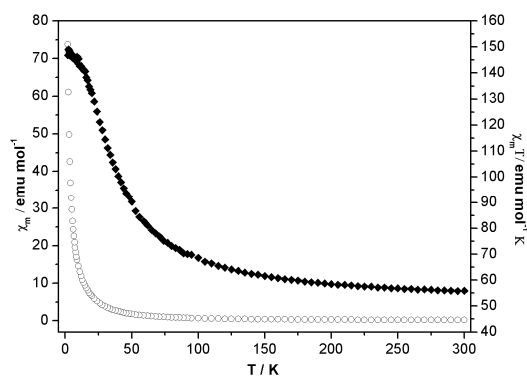

Figure S10. Temperature dependence of  $\chi_m T$  (◆) and  $\chi_m$  (○) values for **2** between 2.0 to 300 K.

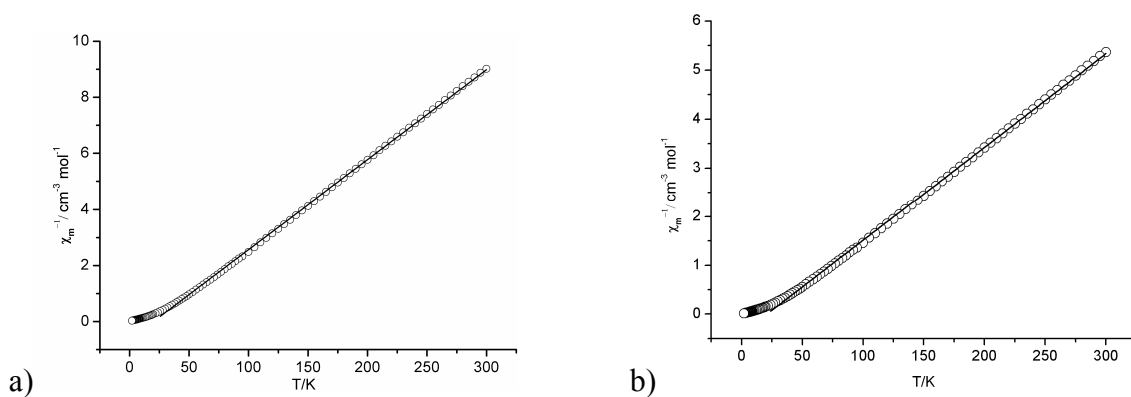

Figure S11. Temperature dependence of  $\chi_m^{-1}$  for **1** and **2**. The solid lines are the best-fit according to the Curie-Weiss law.

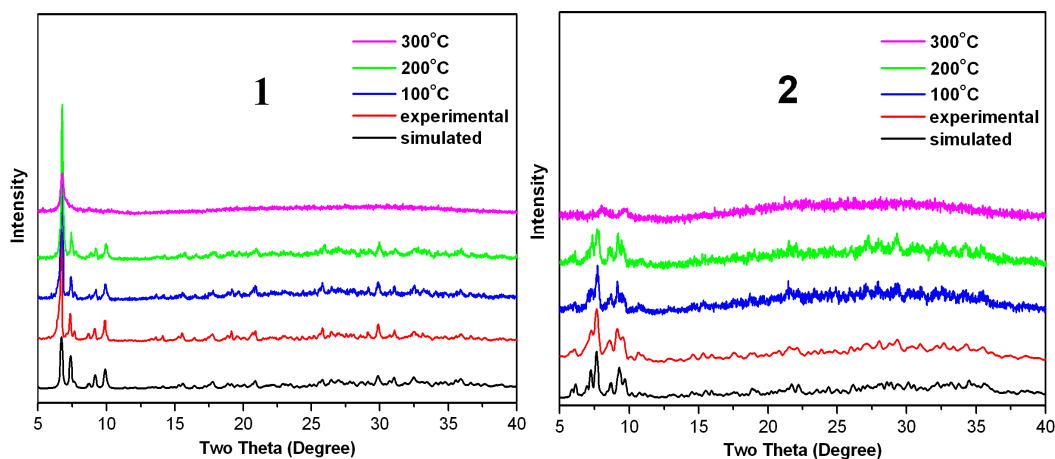

Figure S12. Thermodiffractograms of poly(POT)s samples **1** and **2**, showing the bulk product are in good agreement with the calculated patterns based on the results from single-crystal X-ray diffraction. Crystals of **1** and **2** are stable lower than 300°C.

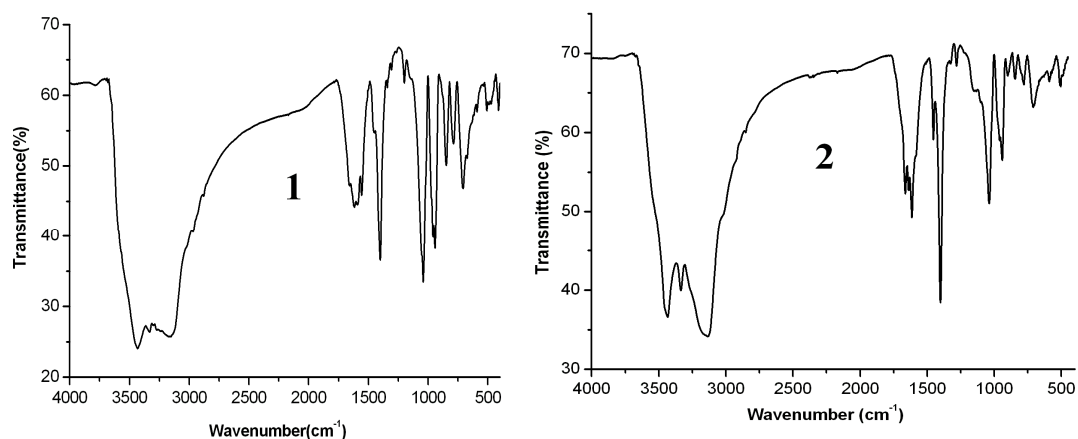

**Figure S13.** IR spectra of poly(POT)s **1** and **2**, exhibiting an intense band at  $1040\text{ cm}^{-1}$ , attributed to the feature of  $\nu_{\text{P-O}}$ , and bands at  $940\text{ cm}^{-1}$  due to  $\nu_{\text{W=O}}$ , bands at  $850$ ,  $790$ , and  $710\text{ cm}^{-1}$  due to  $\nu_{\text{M-O-M}}$  ( $\text{M} = \text{W}$  or  $\text{Ni}$ ). The characteristics of the  $-\text{NH}_2$  and  $-\text{CH}_2$  groups are fallen in the  $1400$  and  $3100\text{--}3300\text{ cm}^{-1}$  region.

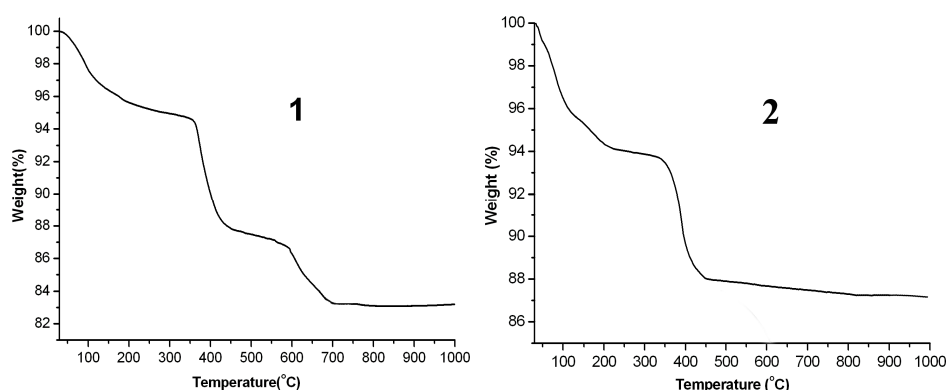

**Figure S14.** TG curves of poly(POT)s **1** and **2**, respectively.

As shown in Figure S13, the TG curve of **1** shows three major weight loss stages in the regions about  $30\text{--}351$ ,  $351\text{--}574$ , and  $574\text{--}700^\circ\text{C}$ , while the TG curve of **2** exhibits two steps weight loss stages in the regions about  $30\text{--}318$  and  $318\text{--}800^\circ\text{C}$ , respectively. To tetramer **1**, the observed total weight loss of **1** ( $16.9\%$ ) is in agreement with the calculated value of **1** ( $15.5\%$ ). The first weight loss of **1** is  $5.4\%$  from  $30\text{--}351^\circ\text{C}$ , assigned to the release of 10 lattice water molecules, 12 coordinated water ligands and the partial enMe ligands (three enMe, calcd  $5.0\%$ ), followed by the loss of  $7.8\%$  from  $351\text{--}574^\circ\text{C}$  corresponding to the removal of the remanent enMe ligands (eleven enMe, calcd  $6.6\%$ ), the third weight loss of  $3.7\%$  between  $574\text{--}700^\circ\text{C}$  corresponding to the removal of four carboxyl groups and the dehydration of the protons and the hydroxyl groups (calcd  $3.9\%$ ). To octamer **2**, the observed total weight loss of **2** ( $12.8\%$ ) is in agreement with the calculated value of **2** ( $11.9\%$ ). The first weight loss is  $6.2\%$  from  $30\text{--}318^\circ\text{C}$ , assigned to the release of 10 lattice water molecules, 26 coordinated water ligands and the partial en ligands (fourteen en, calcd  $6.3\%$ ), followed by the loss of  $6.6\%$  from  $318\text{--}800^\circ\text{C}$  corresponding to the removal of the remanent en ligands (fourteen en ligands) and two carboxyl groups, as well as the dehydration of the protons and the hydroxyl groups (calcd  $5.6\%$ ).
